# Supplementary material for: Analysis and prediction of defects in UV photo-initiated polymer microarrays
Source: PubMed Central journal article supplement — J Mater Chem B. 2012 Dec 20;1(7):1035–43. doi: 10.1039/c2tb00379a (PMC4357255; doi:10.1039/c2tb00379a), 2012-12-20
Supplement: TB-001-C2TB00379A-s001.pdf [file TB-001-C2TB00379A-s001.pdf]

## Analysis and prediction of defects in UV photo-initiated polymer microarrays – Electronic supplementary information

Andrew L. Hook<sup>a</sup>, David J. Scurr<sup>a</sup>, Jonathan C. Burley<sup>a</sup>, Robert Langer<sup>b</sup>, Daniel G. Anderson<sup>b</sup>, Martyn C. Davies<sup>a</sup>, Morgan R. Alexander<sup>a</sup>

<sup>a</sup> *Laboratory of Biophysics and Surface Analysis, University of Nottingham, UK, NG7 2RD*

<sup>b</sup> *David H. Koch Institute for Integrative Cancer Research, Massachusetts Institute of Technology, USA, 02139*

**Table ESI1** List of top 20 molecular descriptors and the corresponding regression coefficient (RC) associated with promoting (positive RC) or preventing (negative RC) a particular defect for PLS models describing the total number of defects. Descriptors prefixed with 'Δ' relate to the difference in the molecular descriptor of the monomer components, whereas non-prefixed descriptors relate to the average value of the molecular descriptors of the monomer components.

| Positive regression coefficient |                                | Negative regression coefficient |                                 |
|---------------------------------|--------------------------------|---------------------------------|---------------------------------|
| Regression coefficient          | Molecular descriptor           | Regression coefficient          | Molecular descriptor            |
| 0.56                            | Δkhs.ssCH <sub>2</sub>         | -1.11                           | ΔC <sub>3</sub> sp <sub>2</sub> |
| 0.52                            | BCUTw.11                       | -0.97                           | ΔtopoShape                      |
| 0.50                            | Δkhs.sCH <sub>3</sub>          | -0.38                           | khs.aaCH                        |
| 0.45                            | C <sub>3</sub> sp <sub>2</sub> | -0.38                           | ΔBCUTw.1h                       |
| 0.45                            | HybRatio                       | -0.33                           | LipinskiFailures                |
| 0.44                            | ΔBCUTw.11                      | -0.30                           | ΔVC.4                           |
| 0.33                            | ΔECCEN                         | -0.30                           | Δkhs.ssO                        |
| 0.32                            | khs.sCH <sub>3</sub>           | -0.26                           | ΔSC.4                           |
| 0.31                            | VC.4                           | -0.24                           | ΔVC.3                           |
| 0.30                            | ΔVP.1                          | -0.24                           | C <sub>2</sub> sp <sub>3</sub>  |
| 0.28                            | Δbpol                          | -0.24                           | SCH.5                           |
| 0.26                            | ΔBCUTp.1h                      | -0.24                           | khs.sssCH                       |
| 0.25                            | ΔnAtom                         | -0.24                           | VCH.5                           |
| 0.25                            | ΔWPATH                         | -0.23                           | BCUTc.1h                        |
| 0.24                            | ΔVP.4                          | -0.22                           | ΔATSc4                          |
| 0.24                            | ΔVP.3                          | -0.22                           | ΔnHBDOn                         |
| 0.23                            | Δapol                          | -0.21                           | Δkhs.dssC                       |
| 0.23                            | ΔKier3                         | -0.21                           | ΔSCH.3                          |
| 0.23                            | BCUTc.11                       | -0.21                           | SCH.6                           |
| 0.21                            | VC.3                           | -0.21                           | ΔLipinskiFailures               |

**Table ESI2** List of top 20 molecular descriptors and the corresponding regression coefficient (RC) associated with promoting (positive RC) or preventing (negative RC) a particular defect for PLS models describing each defect. Descriptors prefixed with ‘Δ’ relate to the difference in the molecular descriptor of the monomer components, whereas non-prefixed descriptors relate to the average value of the molecular descriptors of the monomer components.

| Non-Circular           |                        | Spreading              |                        | Rough                  |                        | Chemical heterogeneity |                       | Diameter               |                        |
|------------------------|------------------------|------------------------|------------------------|------------------------|------------------------|------------------------|-----------------------|------------------------|------------------------|
| Regression coefficient | Molecular descriptor   | Regression coefficient | Molecular descriptor   | Regression coefficient | Molecular descriptor   | Regression coefficient | Molecular descriptor  | Regression coefficient | Molecular descriptor   |
| 0.20                   | C <sub>3</sub> sp2     | 0.26                   | Δkhs.ssCH <sub>2</sub> | 0.38                   | ΔFMF                   | 0.16                   | HybRatio              | 176                    | ΔBCUTw.1l              |
| 0.12                   | Δkhs.ssCH <sub>2</sub> | 0.23                   | HybRatio               | 0.18                   | BCUTw.1l               | 0.15                   | ΔC <sub>1</sub> sp3   | 145                    | C <sub>3</sub> sp2     |
| 0.10                   | ΔBCUTw.1l              | 0.23                   | khs.sCH <sub>3</sub>   | 0.16                   | ALogp2                 | 0.14                   | ΔBCUTp.1h             | 121                    | khs.sCH <sub>3</sub>   |
| 0.08                   | ΔECCEN                 | 0.21                   | Δkhs.sCH <sub>3</sub>  | 0.15                   | C <sub>3</sub> sp2     | 0.11                   | Δkhs.dO               | 113                    | HybRatio               |
| 0.08                   | ΔVP.4                  | 0.20                   | VC.4                   | 0.12                   | ALogP                  | 0.08                   | BCUTc.1l              | 111                    | ΔBCUTp.1h              |
| 0.08                   | ΔVP.1                  | 0.17                   | C <sub>3</sub> sp2     | 0.11                   | WPATH                  | 0.08                   | ΔBCUTw.1l             | 101                    | BCUTw.1l               |
| 0.07                   | ΔVP.3                  | 0.16                   | ΔBCUTw.1l              | 0.11                   | ΔECCEN                 | 0.08                   | Δbpol                 | 94                     | Δkhs.sCH <sub>3</sub>  |
| 0.06                   | Δbpol                  | 0.14                   | BCUTw.1l               | 0.11                   | Δkhs.ssCH <sub>2</sub> | 0.07                   | ΔAMR                  | 75                     | Δkhs.ssCH <sub>2</sub> |
| 0.06                   | khs.dssC               | 0.13                   | VC.3                   | 0.10                   | Δkhs.sCH <sub>3</sub>  | 0.06                   | ΔnAtom                | 65                     | Δbpol                  |
| 0.06                   | ΔVP.7                  | 0.12                   | ΔKier3                 | 0.09                   | SC.4                   | 0.06                   | Δapol                 | 65                     | VC.4                   |
| 0.06                   | BCUTw.1l               | 0.12                   | C <sub>4</sub> sp3     | 0.09                   | BCUTc.1l               | 0.06                   | BCUTw.1l              | 59                     | ΔVP.4                  |
| 0.06                   | Δkhs.sCH <sub>3</sub>  | 0.11                   | BCUTc.1l               | 0.09                   | khs.ssssC              | 0.06                   | ΔTopoPSA              | 59                     | C <sub>4</sub> sp3     |
| 0.06                   | Δkhs.aaCH              | 0.11                   | Δbpol                  | 0.08                   | SC.3                   | 0.05                   | ΔnAtomLAC             | 56                     | ΔVP.1                  |
| 0.05                   | khs.sCH <sub>3</sub>   | 0.10                   | ΔBCUTp.1h              | 0.08                   | SC.6                   | 0.05                   | SC.5                  | 56                     | ΔVP.5                  |
| 0.05                   | ΔnAtom                 | 0.10                   | ΔnAtom                 | 0.08                   | VC.3                   | 0.05                   | SC.6                  | 55                     | ΔnAtom                 |
| 0.05                   | khs.ssO                | 0.10                   | ΔVP.1                  | 0.08                   | ΔVP.4                  | 0.05                   | khs.sssN              | 54                     | ΔVP.3                  |
| 0.05                   | Δapol                  | 0.09                   | Δapol                  | 0.08                   | SC.5                   | 0.05                   | khs.sCH <sub>3</sub>  | 53                     | Δapol                  |
| 0.05                   | ΔC <sub>3</sub> sp3    | 0.08                   | ΔMLogP                 | 0.08                   | VC.4                   | 0.04                   | ΔWTPT.4               | 51                     | ΔATSc3                 |
| 0.05                   | HybRatio               | 0.08                   | C <sub>1</sub> sp3     | 0.08                   | ΔBCUTc.1l              | 0.04                   | XLogP                 | 51                     | C <sub>1</sub> sp3     |
| 0.05                   | ΔVP.5                  | 0.08                   | ΔVP.3                  | 0.08                   | ΔBCUTc.1h              | 0.04                   | Δkhs.sCH <sub>3</sub> | 51                     | ΔLipinskiFailures      |
| -0.26                  | ΔC <sub>3</sub> sp2    | -0.43                  | ΔC <sub>3</sub> sp2    | -0.27                  | ΔtopoShape             | -0.21                  | ΔFMF                  | -143                   | ΔtopoShape             |
| -0.24                  | ΔtopoShape             | -0.24                  | LipinskiFailures       | -0.25                  | ΔC <sub>3</sub> sp2    | -0.12                  | ΔC <sub>3</sub> sp2   | -140                   | ΔC <sub>3</sub> sp2    |
| -0.12                  | Δkhs.dssC              | -0.21                  | ΔtopoShape             | -0.18                  | Δkhs.dssC              | -0.11                  | ΔVC.3                 | -86                    | ΔnHBΔon                |
| -0.12                  | khs.sssN               | -0.16                  | ΔSCH.3                 | -0.14                  | ΔATSc3                 | -0.11                  | ΔBCUTw.1h             | -86                    | ΔnHBΔon                |
| -0.11                  | ΔBCUTw.1h              | -0.14                  | Δkhs.ssO               | -0.14                  | ΔBCUTw.1h              | -0.10                  | Δkhs.sssCH            | -79                    | ΔVC.3                  |
| -0.09                  | ΔnHBΔon                | -0.12                  | VCH.5                  | -0.13                  | ΔLipinskiFailures      | -0.10                  | ΔtopoShape            | -76                    | ΔSC.4                  |
| -0.09                  | ΔnHBΔon                | -0.11                  | SCH.5                  | -0.12                  | C <sub>2</sub> sp3     | -0.09                  | ΔVC.4                 | -72                    | ΔALogp2                |
| -0.07                  | ΔVC.4                  | -0.11                  | BCUTc.1h               | -0.12                  | ΔC <sub>1</sub> sp3    | -0.08                  | BCUTc.1h              | -68                    | ΔATSc5                 |
| -0.07                  | ΔATSc5                 | -0.11                  | ΔBCUTc.1l              | -0.11                  | ΔSC.5                  | -0.08                  | ΔSC.4                 | -65                    | ΔALogP                 |
| -0.07                  | ΔnAtomLAC              | -0.11                  | ΔBCUTc.1h              | -0.09                  | ΔVPC.4                 | -0.08                  | ΔC <sub>3</sub> sp3   | -64                    | ΔATSc4                 |
| -0.07                  | C <sub>3</sub> sp3     | -0.11                  | fragC                  | -0.09                  | BCUTc.1h               | -0.08                  | ΔnAtomLC              | -62                    | ΔSC.3                  |
| -0.07                  | SCH.5                  | -0.11                  | khs.aaCH               | -0.09                  | ΔSPC.4                 | -0.07                  | ΔSC.3                 | -61                    | Δkhs.dCH <sub>2</sub>  |
| -0.07                  | VCH.5                  | -0.10                  | SCH.6                  | -0.08                  | WTPT.2                 | -0.07                  | ΔSP.2                 | -60                    | khs.dsCH               |
| -0.06                  | Δkhs.dCH <sub>2</sub>  | -0.10                  | ΔC <sub>3</sub> sp3    | -0.08                  | ΔnAtomLAC              | -0.07                  | FMF                   | -57                    | C <sub>3</sub> sp3     |
| -0.06                  | khs.sssCH              | -0.10                  | ΔVAdjMat               | -0.08                  | khs.aaCH               | -0.07                  | ΔZagreb               | -53                    | FMF                    |
| -0.06                  | khs.aaCH               | -0.10                  | ΔATSm2                 | -0.08                  | Δkhs.sF                | -0.06                  | ΔVAdjMat              | -51                    | ΔSP.2                  |
| -0.06                  | VP.7                   | -0.09                  | ΔnAtomLC               | -0.07                  | ΔVC.4                  | -0.06                  | WTPT.4                | -51                    | Δkhs.ssO               |
| -0.06                  | fragC                  | -0.09                  | ΔWTPT.4                | -0.07                  | BCUTw.1h               | -0.06                  | khs.aaCH              | -51                    | Δkhs.dssC              |
| -0.06                  | ΔATSc3                 | -0.09                  | ΔSP.2                  | -0.07                  | ATSc4                  | -0.06                  | Δkhs.sF               | -49                    | SCH.5                  |
| -0.05                  | ΔATSc4                 | -0.09                  | ΔATSc1                 | -0.07                  | SCH.6                  | -0.06                  | khs.ssO               | -48                    | VCH.5                  |

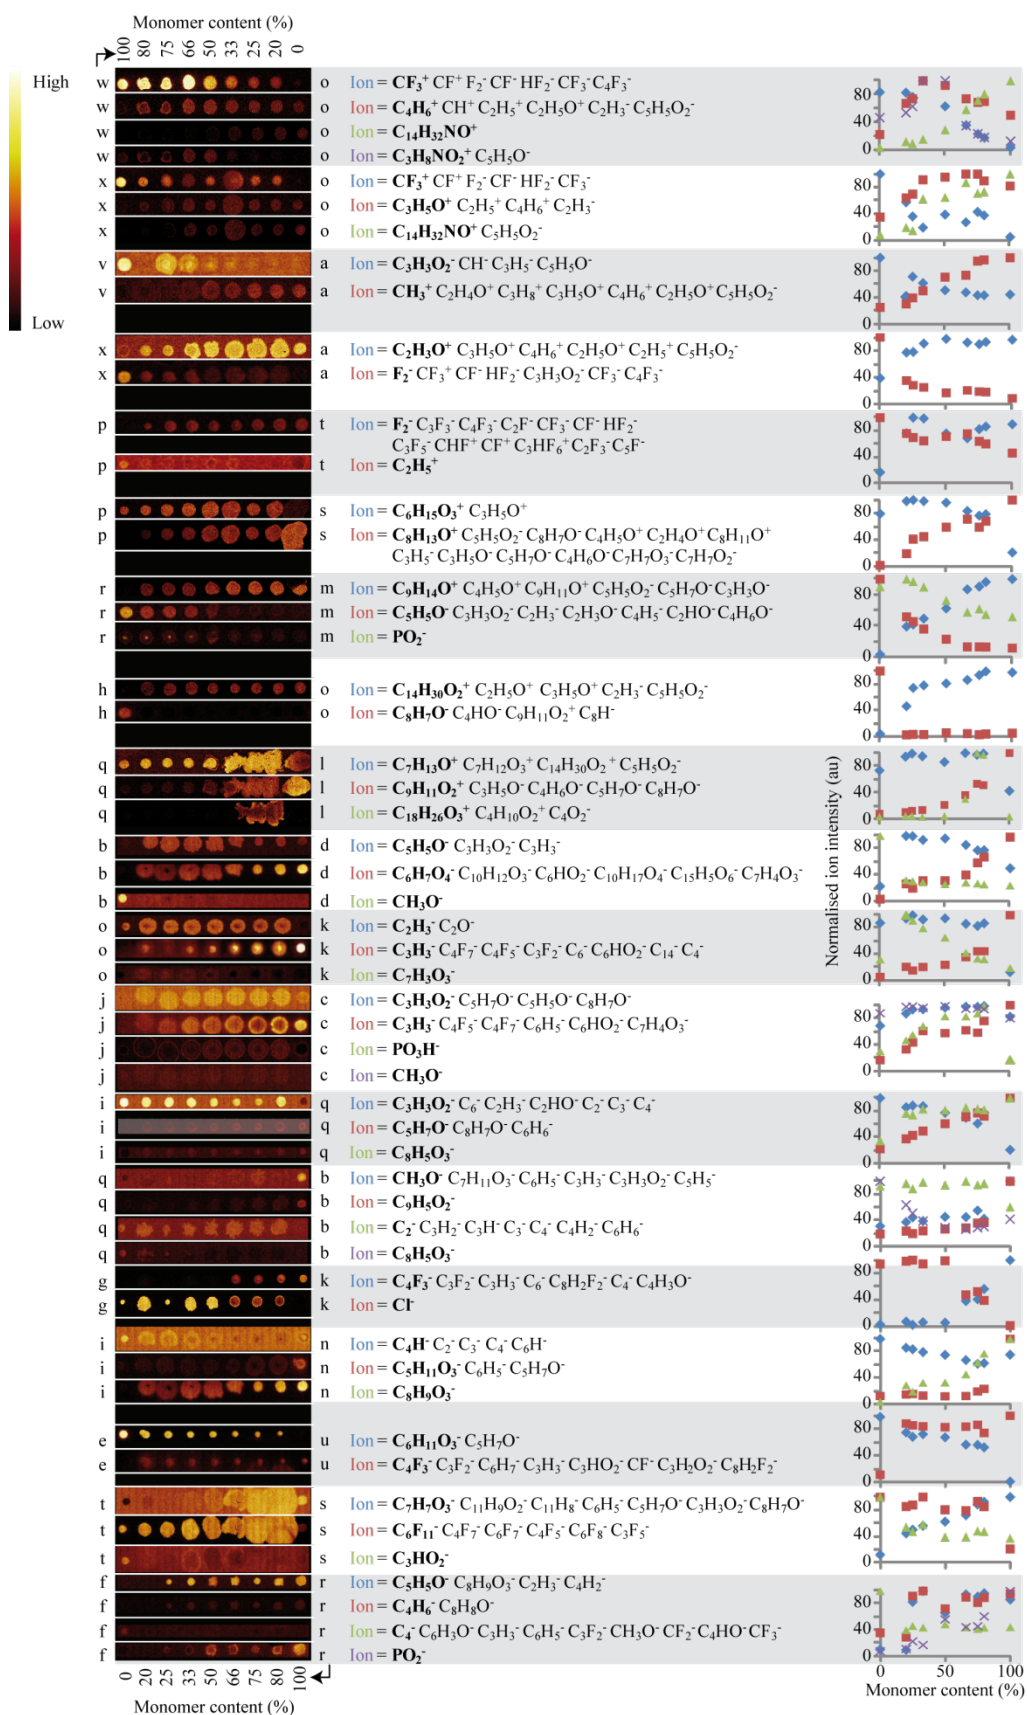

**Fig. ES11** ToF-SIMS images of each copolymer pair within the odd spot array with various ions mapped. The intensity scale is shown on the left. For each image the intensity was scaled to maximise the contrast for each ion, thus, the scale is arbitrary for each image. All ions that gave a similar image are shown to the right of each image. The intensity of the ion in bold is shown in the chemical maps/graphs.

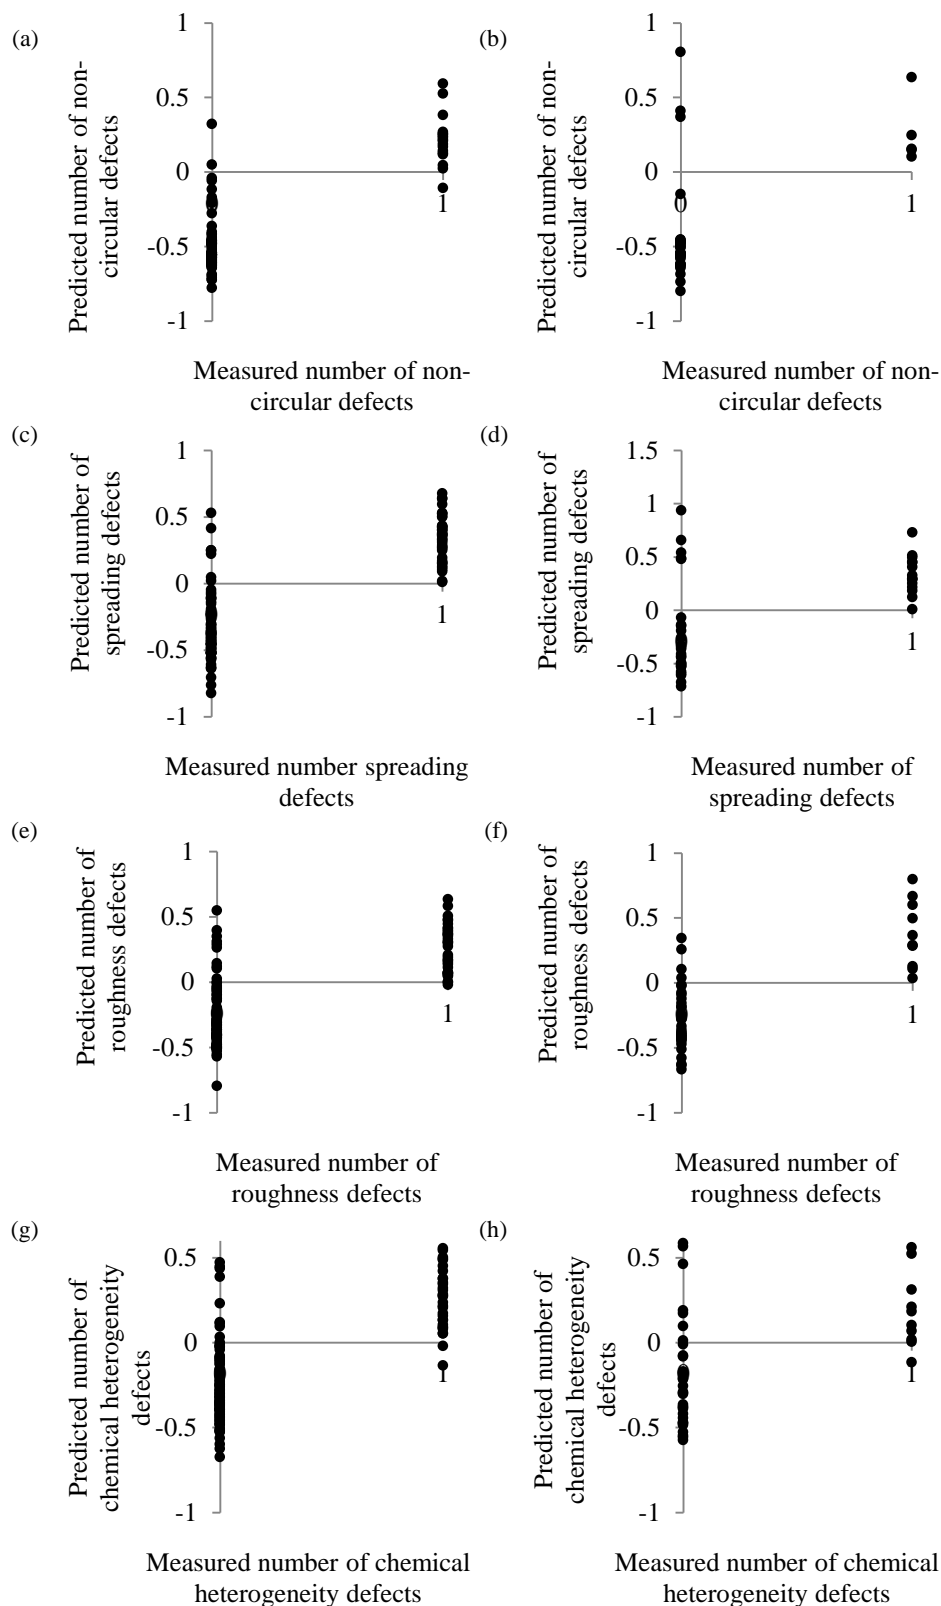

**Fig. ESI2** PLS regression model prediction of the occurrence of defects (a-b) non-circular, (c-d) spreading, (e-f) roughness, and (g-h) chemical heterogeneity. Model calculated for the (a, c, e, g) training set and (b, d, f, h) test set. The number of correct predictions (positive = defect present, negative = defect absent) is (a) 97.7%, (b) 92.9%, (c) 94.6%, (d) 88.1%, (e) 90.7%, (f) 90.5%, (g) 90.7, (h) 81.0%.

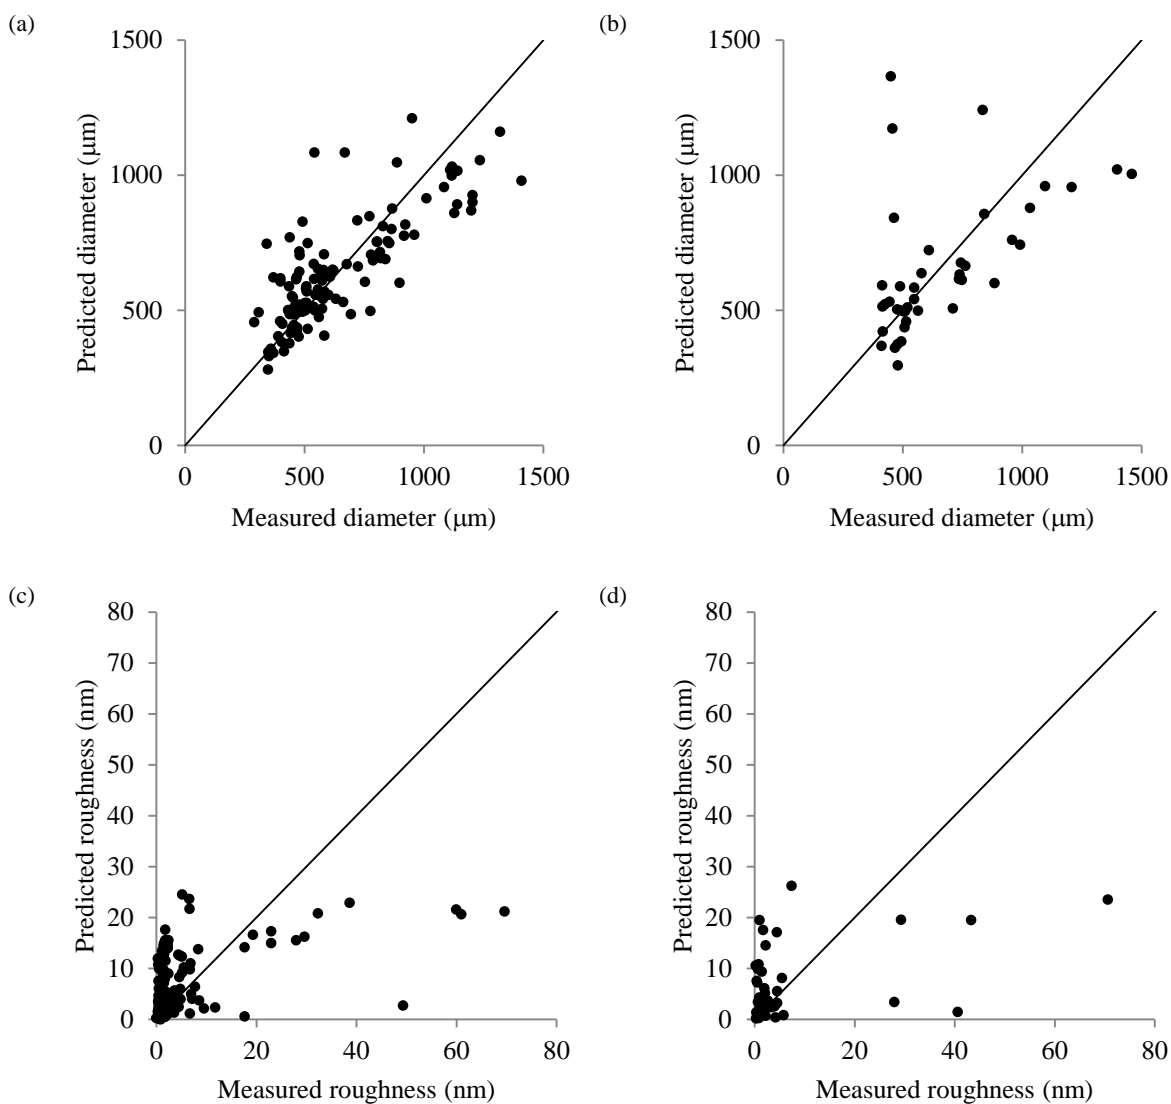

**Fig. ESI13** PLS regression model prediction of the (a-b) diameter and (c-d) roughness of polymer spots, calculated for the (a, c) training set and (b, d) test set.  $R^2$  value = (a) 0.42, (b) -0.01, (c) -1.50 and (d) -2.29.

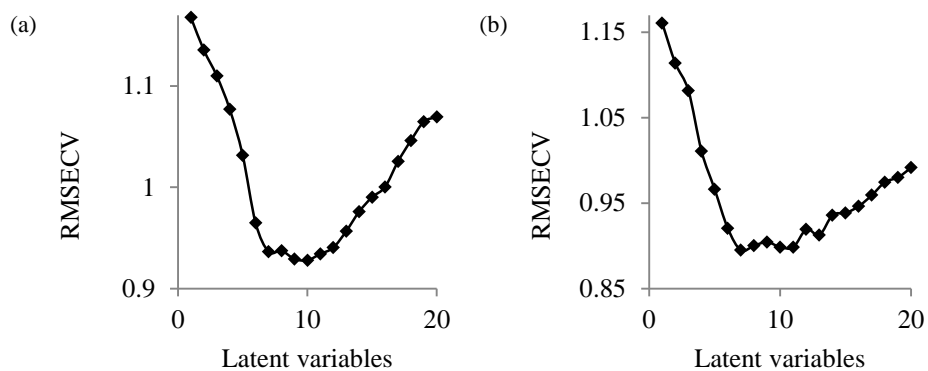

**Fig. ESI14** Root mean square error of cross validation (RMSECV) curves for PLS models. (a) First model produced with 244 x-variables. (b) Second model produced with 166 x-variables. A minimum of the RMSECV curve at the lowest number of latent variables (7) was used to determine the number of latent variables to be used for the formation of a model.
